# Supplementary material for: Integrative Metabolomic Characterization Reveals the Mediating Effect of Bifidobacterium breve on Amino Acid Metabolism in a Mouse Model of Alzheimer’s Disease
Source: MDPI journal article supplement (doi:10.3390/nu14040735), 2022-02-09
Supplement: s1 [file s1]

## Supplementary Tables

Table S1. The differential metabolites in serum among three groups using one-way ANOVA.

| Metab_id | Metabolite                                                                                                 | Chi squared | P value  |
|----------|------------------------------------------------------------------------------------------------------------|-------------|----------|
| P158     | LysoPC(22:5(7Z,10Z,13Z,16Z,19Z))                                                                           | 16.154      | 0.000311 |
| P95      | LysoPC(22:5(7Z,10Z,13Z,16Z,19Z))                                                                           | 14.672      | 0.000652 |
| N219     | L-Tyrosine                                                                                                 | 14.514      | 0.000705 |
| N206     | (2S)-N2-[(2S)-1-amino-3-cyclohexyl-1-oxo-2-propanyl]-N1-isopropyl-N4-phenyl-1,2,4-piperazinetricarboxamide | 14.417      | 0.00074  |
| P106     | L-alpha-lysophosphatidylcholine                                                                            | 14.416      | 0.000741 |
| N223     | L-Tyrosine                                                                                                 | 13.668      | 0.001077 |
| N20      | cis-5,8,11,14,17-Eicosapentaenoic acid                                                                     | 12.455      | 0.001974 |
| N67      | L-Phenylalanine                                                                                            | 12.145      | 0.002305 |
| P24      | Dibutyl phthalate                                                                                          | 11.634      | 0.002976 |
| N297     | 2-Hydroxymyristic acid                                                                                     | 10.76       | 0.004608 |
| N51      | D-(+)-Tryptophan                                                                                           | 10.756      | 0.004617 |
| P52      | LysoPC(20:5(5Z,8Z,11Z,14Z,17Z))                                                                            | 10.314      | 0.005758 |
| P70      | Docosahexaenoic acid                                                                                       | 10.272      | 0.005882 |
| P15      | Betaine                                                                                                    | 10.189      | 0.006129 |
| P306     | Methyl palmitate                                                                                           | 10.143      | 0.006274 |
| P11      | DA9185000                                                                                                  | 10.137      | 0.006292 |
| N271     | 5-[(2Z,8Z)-2,8-Pentadecadien-1-yl]-1,3-benzenediol                                                         | 10.01       | 0.006703 |
| N236     | LT9970000                                                                                                  | 9.8739      | 0.007176 |
| N173     | Plumbagin                                                                                                  | 9.8482      | 0.007269 |
| N257     | (R)-10-Hydroxystearate                                                                                     | 9.7781      | 0.007529 |
| N71      | Adrenic acid                                                                                               | 9.7746      | 0.007542 |
| N94      | 3-Oxotetradecanoic acid                                                                                    | 9.5713      | 0.008349 |
| N5       | Docosahexaenoic Acid                                                                                       | 9.5537      | 0.008423 |
| P10      | 2-Amino-1,3-octadecanediol                                                                                 | 9.1746      | 0.01018  |
| N266     | Bufanolide                                                                                                 | 8.8914      | 0.011729 |
| N274     | 3-(3,4-Dimethyl-5-pentyl-2-furyl)propanoic acid                                                            | 8.7981      | 0.012289 |
| P55      | N,N-Dimethyldecylamine N-oxide                                                                             | 8.7482      | 0.012599 |
| N172     | Tridecylic acid                                                                                            | 8.6717      | 0.01309  |
| P7       | 1-phenylpropane-1_2-dione                                                                                  | 8.5282      | 0.014064 |
| P8       | L-Phenylalanine                                                                                            | 8.5282      | 0.014064 |

Table S2. The differential metabolites in hippocampus among three groups using one-way ANOVA.

| Metab_id | Metabolite                        | Chi squared | P value  |
|----------|-----------------------------------|-------------|----------|
| N80      | Abieticacid                       | 2037.6      | 1.30E-26 |
| N56      | 6-Aminocaproic acid               | 249.16      | 2.59E-16 |
| N66      | Glycerol 3-phosphate              | 19.556      | 1.09E-05 |
| N165     | Hydroxymethylphosphonate          | 18.047      | 1.94E-05 |
| N89      | Deoxyguanosine diphosphate (dGDP) | 14.927      | 6.99E-05 |
| N110     | Guanosine monophosphate (GMP)     | 11.998      | 0.00027  |
| N18      | L-Glutathione oxidized            | 11.987      | 0.000271 |

|      |                                              |        |          |
|------|----------------------------------------------|--------|----------|
| N93  | UDP-N-acetylglucosamine                      | 11.901 | 0.000283 |
| N292 | 1-Palmitoyl-2-hydroxy-sn-glycero-3-PE        | 11.553 | 0.000336 |
| N4   | L-Glutamic acid                              | 11.253 | 0.000391 |
| N117 | Uridine 5'-diphosphogalactose                | 11.16  | 0.00041  |
| N195 | Anserine                                     | 11.142 | 0.000413 |
| N286 | D-Erythrose4-phosphate                       | 11.031 | 0.000438 |
| N143 | butanethiol                                  | 10.91  | 0.000466 |
| N127 | Inosine-5'-monophosphate (IMP)               | 10.472 | 0.000584 |
| N238 | Cytidine;1-beta-delta-Ribofuranosyl-Cytosine | 9.7704 | 0.000848 |
| N5   | Taurine                                      | 9.4425 | 0.001014 |
| N30  | Adenine                                      | 8.5595 | 0.001665 |
| N2   | N-Acetylaspartic acid                        | 8.5434 | 0.00168  |

## Supplementary Figures and Figure legends

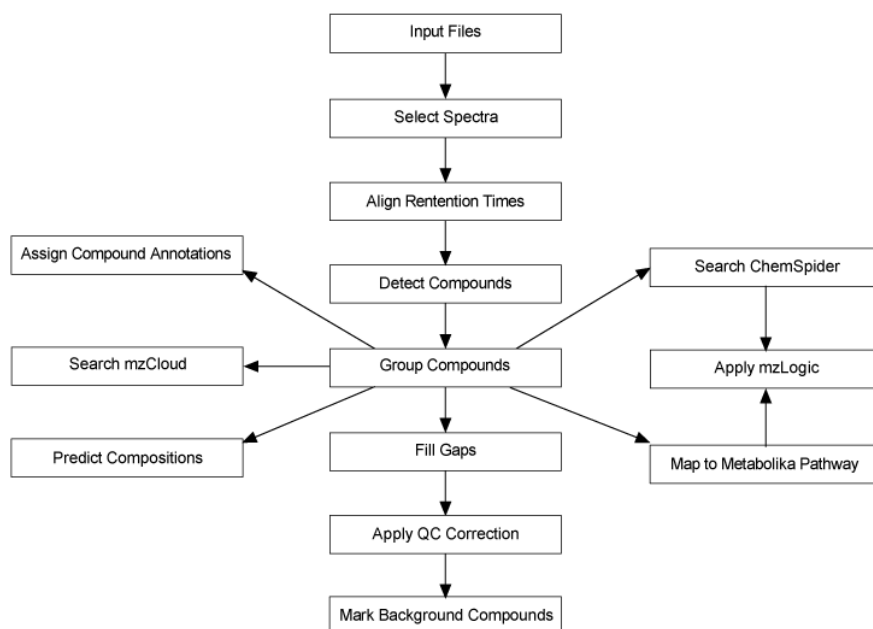

Figure S1. The flow chart of processing workflow used in this study.

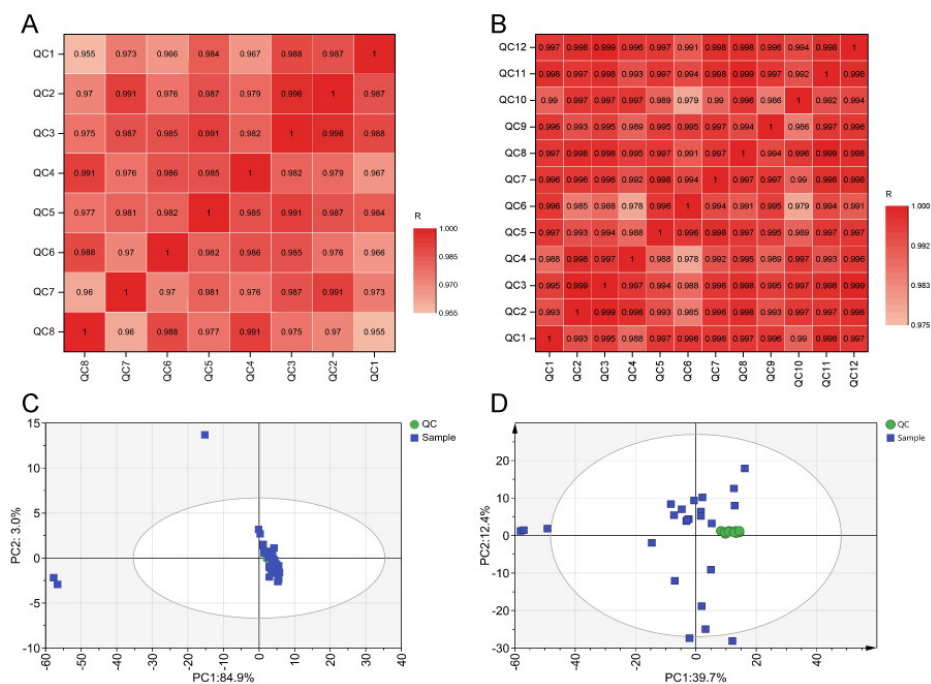

Figure S2. Quality control assessment. The Pearson correlation of serum (A) and hippocampus tissues (B) in ESI<sup>+</sup> mode. The PCA score plots for all serum (C) and hippocampus (D) samples containing QC samples in ESI<sup>+</sup> mode. Note: ESI<sup>+</sup>, negative electrospray ionization.

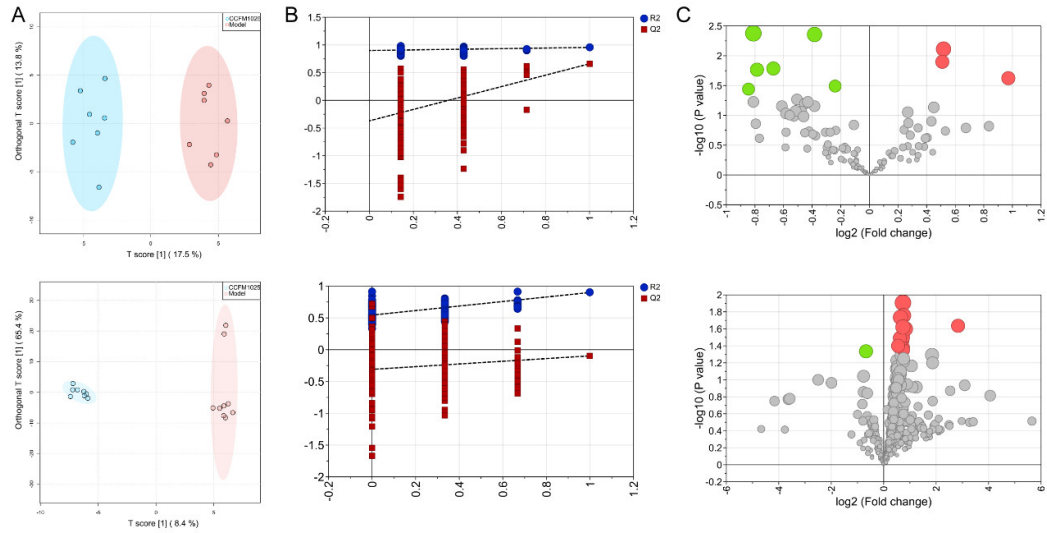

Figure S3. Metabolic alterations were identified in *B. breve* CCFM1025 compared with model group in ESI<sup>+</sup> mode. (A) OPLS-DA score plots for serum (up) and hippocampus (down) samples. X and Y axis represent the contribution of the first two principal components (PC1 and PC2). (B) Cross-validation plot for serum (up) and hippocampus (down) OPLS-DA model with a permutation test repeated 200 times. The intercepts of R2= (0.0, 0.9) and Q2= (0.0, -0.37) and R2= (0.0, 0.544) and Q2= (0.0, -0.309) suggest that the OPLS-DA model is not overfitting. (C) Volcano plots showing the results of pairwise comparisons of serum (up) and hippocampal (down) metabolites in *B. breve* CCFM1025 and model group. Metabolites with significant changes are presented in red (upregulated) or green (downregulated). Note: ESI<sup>+</sup>, positive electrospray ionization; OPLS-DA, Orthogonal partial least squares discrimination analysis.
